# Supplementary material for: An insight into the structure of acebutolol tetraphenylborate: crystal structure and quantum chemical calculations
Source: Royal Society of Chemistry journal article supplement (doi:10.1039/d4ra07163h), 2025-01-01
Supplement: d4ra07163h1.pdf [file d4ra07163h1.pdf]

Supporting information

**An insight into the structure of Acebutolol tetraphenylborate: Crystal structure and quantum chemical calculations**

Ahmed M. Mansour,<sup>\*a,b,1</sup> Gamal A. E. Mostafa,<sup>c,1</sup> Krzysztof Radacki,<sup>d</sup> Essam A. Ali,<sup>c</sup>  
Ola R. Shehab,<sup>\*b</sup>

---

<sup>a.</sup> *Department of Chemistry, United Arab Emirates University, Al-Ain, United Arab Emirates. [Mansour\\_am@uaeu.ac.ae](mailto:Mansour_am@uaeu.ac.ae); [inorganic\\_am@yahoo.com](mailto:inorganic_am@yahoo.com)*

<sup>b.</sup> *Department of Chemistry, Faculty of Science, Cairo University, Gamma Street, Giza, Cairo 12613, Egypt.*

<sup>c.</sup> *Department of Pharmaceutical Chemistry, College of Pharmacy, King Saud University, Riyadh 11451, Saudi Arabia.*

<sup>d.</sup> *Institut für Anorganische Chemie, Julius-Maximilians-Universität Würzburg, Am Hubland, D-97074 Würzburg, Germany.*

---

<sup>1</sup> *equal contribution.*

|                  |                                                                                                                                                                                           |     |
|------------------|-------------------------------------------------------------------------------------------------------------------------------------------------------------------------------------------|-----|
| <b>Table S1</b>  | Experimental and calculated bond lengths and bond angles of the ion-pair complex                                                                                                          | S3  |
| <b>Table S2</b>  | Single-crystal X-ray diffraction data of the ion-pair complex                                                                                                                             | S6  |
| <b>Table S3</b>  | Atomic coordinates of the optimized structure of Acebutolol                                                                                                                               | S7  |
| <b>Table S4</b>  | Atomic coordinates of the optimized structure of mono-protonated Acebutolol ion.                                                                                                          | S9  |
| <b>Table S5</b>  | Atomic coordinates of the optimized structure of mono-negatively tetraphenyl borate ion                                                                                                   | S11 |
| <b>Table S6</b>  | Atomic coordinates of the optimized structure of Acebutolol–tetraphenyl borate ion-pair complex                                                                                           | S13 |
| <b>Table S7</b>  | Comparison of the calculated bond lengths for the protonated, ion-pair, and free form of the Acebutolol framework                                                                         | S16 |
| <b>Table S8</b>  | Occupancy of natural orbitals (NBOs) and hybrids calculated for the mono-protonated Acebutolol ion (Selected).                                                                            | S17 |
| <b>Table S9</b>  | Occupancy of natural orbitals (NBOs) and hybrids calculated for the Acebutolol–tetraphenyl borate ion-pair complex (Selected).                                                            | S18 |
| <b>Fig. S1</b>   | IR spectrum of Acebutolol hydrochloride.                                                                                                                                                  | S19 |
| <b>Fig. S2</b>   | IR spectrum of Acebutolol–tetraphenyl borate ion-pair complex.                                                                                                                            | S20 |
| <b>Fig. S3</b>   | Calculated IR spectra of <b>a)</b> Acebutolol, <b>b)</b> Mono-protonated Acebutolol, <b>c)</b> ion-pair complex and <b>d)</b> tetraphenyl borate ion.                                     | S21 |
| <b>Fig. S4</b>   | NMR spectra of Acebutolol–tetraphenyl borate ion-pair; (a) $^1\text{H}$ and (b) $^{13}\text{C}$ .                                                                                         | S23 |
| <b>Fig. S5</b>   | Calculated electronic absorption spectra of tetraphenyl borate ion <b>a)</b> B3LYP/6-31G(d), and <b>b)</b> CAM-B3LYP/6-31G(d)                                                             | S25 |
| <b>Fig. S6</b>   | Calculated electronic absorption spectra of acebutolol (D) and its mono-protonated acebutolol ( $\text{DH}^+$ ) using <b>a)</b> B3LYP/6-31G(d), and <b>b)</b> CAM-B3LYP/6-31G(d)          | S25 |
| <b>Fig. S7</b>   | Electronic absorption spectra of Acebutolol–tetraphenyl borate ion-pair in different solvents; (a) DMSO, DMF, THF, Dioxane and chloroform; (b) Acetonitrile, methanol and dichloromethane | S26 |
| <b>Fig. S8</b>   | Comparison between the experimental (in DMSO) and calculated electronic absorption spectra of Acebutolol–tetraphenyl borate ion-pair (using B3LYP and CAM-B3LYP functional).              | S27 |
| <b>Table S10</b> | Selected experimental and theoretical chemical shifts of the ion-pair complex                                                                                                             | S28 |
| <b>Fig. S9</b>   | ESI MS spectra of Acebutolol–tetraphenyl borate ion-pair complex.                                                                                                                         | S29 |

**Table S1** Experimental and calculated bond lengths and bond angles of the ion-pair complex

| Bond length<br>(Å) | Exp <sup>#</sup> | Calculated | Bond angles (°)   | Exp       | Calculated* |
|--------------------|------------------|------------|-------------------|-----------|-------------|
| C1_1-C2_1          | 1.415(2)         | 1.42176    | C2_1-C1_1- C6_1   | 119.9(1)  | 118.8       |
| C1_1-C6_1          | 1.393(2)         | 1.40137    | C2_1-C1_1-O7_1    | 117.9(1)  | 118.8       |
| C1_1-O7_1          | 1.360(1)         | 1.35975    | C6_1-C1_1-O7_1    | 122.3(1)  | 122.2       |
| C2_1-C3_1          | 1.402(2)         | 1.40623    | C1_1-C2_1-C3_1    | 117.9(1)  | 118.9       |
| C2_1-C16_1         | 1.484(2)         | 1.48849    | C1_1-C2_1-C16_1   | 123.0(1)  | 123.0       |
| C3_1-C4_1          | 1.381(2)         | 1.39682    | C3_1-C2_1-C16_1   | 119.1(1)  | 118.1       |
| C4_1-C5_1          | 1.388(2)         | 1.40028    | C2_1-C3_1-C4_1    | 121.6(1)  | 121.9       |
| C4_1-N19_2         | 1.431(2)         | 1.40988    | C3_1-C4_1-C5_1    | 119.8(1)  | 118.2       |
| C5_1-C6_1          | 1.383(2)         | 1.38940    | C3_1-C4_1-N19_2   | 120.9(1)  | 123.4       |
| O7_1-C8_1          | 1.442(1)         | 1.43133    | C5_1-C4_1-N19_2   | 119.3(1)  | 118.4       |
| C8_1-C9_1          | 1.511(2)         | 1.52551    | C4_1-C5_1-C6_1    | 120.0(1)  | 121.1       |
| C9_1-O10_1         | 1.423(1)         | 1.41942    | C1_1-C6_1-C5_1    | 120.8(1)  | 120.9       |
| C9_1-C11_1         | 1.525(2)         | 1.54216    | C1_1-O7_1-C8_1    | 117.49(9) | 119.0       |
| C11_1-N12_1        | 1.488(2)         | 1.49975    | O7_1-C8_1-C9_1    | 107.77(9) | 109.4       |
| N12_1-C13_1        | 1.510(2)         | 1.52324    | C8_1-C9_1-O10_1   | 113.3(1)  | 109.4       |
| C13_1-C14_1        | 1.514(2)         | 1.52703    | C8_1-C9_1-C11_1   | 112.9(1)  | 114.4       |
| C13_1-C15_1        | 1.515(2)         | 1.52814    | O10_1-C9_1-C11_1  | 106.61(9) | 109.5       |
| C16_1-O17_1        | 1.226(1)         | 1.23143    | C9_1-O10_1-H10_1  | 109.4(9)  |             |
| C16_1-C18_1        | 1.507(2)         | 1.51988    | C9_1-C11_1-N12_1  | 109.64(9) | 109.4       |
| N19_2-C20_2        | 1.343(4)         | 1.38048    | C11_1-N12_1-C13_1 | 114.83(9) | 116.3       |
| C20_2-O21_2        | 1.232(7)         | 1.22442    | N12_1-C13_1-C14_1 | 109.4(1)  | 108.3       |
| C20_2-C22_2        | 1.518(9)         | 1.52825    | N12_1-C13_1-C15_1 | 108.8(1)  | 110.3       |
| C22_2-C23_2        | 1.53(1)          | 1.53493    | C14_1-C13_1-C15_1 | 112.4(1)  | 112.6       |
| C23_2-C24_2        | 1.53(1)          | 1.53154    | C2_1-C16_1-O17_1  | 123.2(1)  | 123.0       |
| B1-C1_3            | 1.650(2)         | 1.66541    | C2_1-C16_1-C18_1  | 118.5(1)  | 118.9       |
| B1-C1_4            | 1.654(2)         | 1.66130    | O17_1-C16_1-C18_1 | 118.3(1)  | 118.1       |
| B1-C1_5            | 1.649(2)         | 1.66217    | C4_1-N19_2-C20_2  | 117.3(3)  | 128.6       |

|           |          |         |                   |           |       |
|-----------|----------|---------|-------------------|-----------|-------|
| B1-C1_6   | 1.650(2) | 1.66303 | N19_2-C20_2-O21_2 | 125.0(5)  | 123.3 |
| C1_3-C2_3 | 1.401(2) | 1.41088 | N19_2-C20_2-C22_2 | 115.1(5)  | 114.3 |
| C1_3-C6_3 | 1.411(2) | 1.39611 | O21_2-C20_2-C22_2 | 119.8(6)  | 122.3 |
| C2_3-C3_3 | 1.399(2) | 1.39676 | C20_2-C22_2-C23_2 | 109.8(6)  | 112.4 |
| C3_3-C4_3 | 1.389(2) | 1.39401 | C22_2-C23_2-C24_2 | 112.3(7)  | 113.4 |
| C4_3-C5_3 | 1.396(2) | 1.40380 | C1_3-B1-C1_4      | 110.87(9) | 109.0 |
| C5_3-C6_3 | 1.392(2) | 1.41172 | C1_3-B1-C1_5      | 107.51(9) | 109.2 |
| C1_4-C2_4 | 1.403(2) | 1.40830 | C1_3-B1-C1_6      | 109.97(9) | 110.9 |
| C1_4-C6_4 | 1.401(2) | 1.39731 | C1_4-B1-C1_5      | 109.68(9) | 107.8 |
| C2_4-C3_4 | 1.395(2) | 1.39514 | C1_4-B1-C1_6      | 108.13(9) | 108.5 |
| C3_4-C4_4 | 1.380(2) | 1.39523 | C1_5-B1-C1_6      | 110.70(9) | 111.3 |
| C4_4-C5_4 | 1.382(2) | 1.39720 | B1-C1_3-C2_3      | 124.2(1)  | 120.9 |
| C5_4-C6_4 | 1.389(2) | 1.41155 | B1-C1_3-C6_3      | 120.5(1)  | 124.2 |
| C1_5-C2_5 | 1.404(2) | 1.41127 | C2_3-C1_3-C6_3    | 115.2(1)  | 123.0 |
| C1_5-C6_5 | 1.408(2) | 1.40056 | C1_3-C2_3-C3_3    | 122.7(1)  | 120.6 |
| C2_5-C3_5 | 1.397(2) | 1.39494 | C2_3-C3_3-C4_3    | 120.2(1)  | 118.5 |
| C3_5-C4_5 | 1.385(2) | 1.39626 | C3_3-C4_3-C5_3    | 119.1(1)  | 120.0 |
| C4_5-C5_5 | 1.392(2) | 1.39739 | C4_3-C5_3-C6_3    | 119.7(1)  | 123.2 |
| C5_5-C6_5 | 1.387(2) | 1.41462 | C1_3-C6_3-C5_3    | 123.1(1)  | 114.7 |
| C1_6-C2_6 | 1.410(2) | 1.41410 | B1-C1_4-C2_4      | 125.1(1)  | 123.1 |
| C1_6-C6_6 | 1.401(2) | 1.39733 | B1-C1_4-C6_4      | 120.1(1)  | 121.5 |
| C2_6-C3_6 | 1.390(2) | 1.39763 | C2_4-C1_4-C6_4    | 114.8(1)  | 122.6 |
| C3_6-C4_6 | 1.388(2) | 1.39600 | C1_4-C2_4-C3_4    | 122.5(1)  | 120.4 |
| C4_6-C5_6 | 1.385(2) | 1.40146 | C2_4-C3_4-C4_4    | 120.7(1)  | 118.7 |
| C5_6-C6_6 | 1.398(2) | 1.41038 | C3_4-C4_4-C5_4    | 118.6(1)  | 120.2 |
|           |          |         | C4_4-C5_4-C6_4    | 120.2(1)  | 122.8 |
|           |          |         | C1_4-C6_4-C5_4    | 123.2(1)  | 115.3 |
|           |          |         | B1-C1_5-C2_5      | 125.8(1)  | 123.8 |
|           |          |         | B1-C1_5-C6_5      | 119.3(1)  | 121.4 |
|           |          |         | C2_5-C1_5-C6_5    | 114.9(1)  | 123.1 |
|           |          |         | C1_5-C2_5-C3_5    | 122.4(1)  | 120.3 |

|  |  |  |                |          |       |
|--|--|--|----------------|----------|-------|
|  |  |  | C2_5-C3_5-C4_5 | 120.6(1) | 118.5 |
|  |  |  | C3_5-C4_5-C5_5 | 118.8(1) | 120.3 |
|  |  |  | C4_5-C5_5-C6_5 | 119.7(1) | 123.1 |
|  |  |  | C1_5-C6_5-C5_5 | 123.6(1) | 114.6 |
|  |  |  | B1-C1_6-C2_6   | 120.5(1) | 121.1 |
|  |  |  | B1-C1_6-C6_6   | 124.6(1) | 123.9 |
|  |  |  | C2_6-C1_6-C6_6 | 114.9(1) | 122.9 |
|  |  |  | C1_6-C2_6-C3_6 | 122.8(1) | 120.2 |
|  |  |  | C2_6-C3_6-C4_6 | 120.4(1) | 118.7 |
|  |  |  | C3_6-C4_6-C5_6 | 118.8(1) | 120.2 |
|  |  |  | C4_6-C5_6-C6_6 | 120.1(1) | 122.9 |
|  |  |  | C1_6-C6_6-C5_6 | 123.0(1) | 115.0 |

##\*The atoms are numbered according to the molecular structure shown in the main text, Fig. 1.

\* B3LYP/6-31G(d) method.

**Table S2** Single-crystal X-ray diffraction data of the ion-pair complex

| Data                                                           | Complex                                                         |
|----------------------------------------------------------------|-----------------------------------------------------------------|
| Empirical formula                                              | C <sub>41</sub> H <sub>48</sub> BN <sub>3</sub> O <sub>4</sub>  |
| Formula weight (g·mol <sup>-1</sup> )                          | 657.63                                                          |
| Temperature (K)                                                | 100(2)                                                          |
| Radiation, $\lambda$ (Å)                                       | Cu <sub>K<math>\alpha</math></sub> , 1.54184                    |
| Crystal system                                                 | monoclinic                                                      |
| Space group                                                    | <i>P2<sub>1</sub>/c</i>                                         |
| <i>Unit cell dimensions</i>                                    |                                                                 |
| <i>a</i> (Å)                                                   | 12.45670(10)                                                    |
| <i>b</i> (Å)                                                   | 23.0603(3)                                                      |
| <i>c</i> (Å)                                                   | 12.78140(10)                                                    |
| <i>a</i> (°)                                                   | 90                                                              |
| <i>b</i> (°)                                                   | 91.2060(10)                                                     |
| <i>c</i> (°)                                                   | 90                                                              |
| Volume (Å <sup>3</sup> )                                       | 3670.71(6)                                                      |
| <i>Z</i>                                                       | 4                                                               |
| Calculated density (Mg·m <sup>-3</sup> )                       | 1.190                                                           |
| Absorption coefficient (mm <sup>-1</sup> )                     | 0.599                                                           |
| <i>F</i> (000)                                                 | 1408                                                            |
| Theta range for collection                                     | 3.834 to 74.868°                                                |
| Reflections collected                                          | 34099                                                           |
| Unique reflections                                             | 7220                                                            |
| Minimum/maximum transmission                                   | 0.792/1.000                                                     |
| Refinement method                                              | Full-matrix least-squares on <i>F</i> <sup>2</sup>              |
| Data / parameters / restraints                                 | 7220 / 496 / 292                                                |
| Goodness-of-fit on <i>F</i> <sup>2</sup>                       | 1.050                                                           |
| Final <i>R</i> indices [ <i>I</i> > 2 $\sigma$ ( <i>I</i> )]   | <i>R</i> <sub>1</sub> = 0.0393, <i>wR</i> <sub>2</sub> = 0.1022 |
| <i>R</i> indices (all data)                                    | <i>R</i> <sub>1</sub> = 0.0429, <i>wR</i> <sub>2</sub> = 0.1044 |
| Maximum/minimum residual electron density (e·Å <sup>-3</sup> ) | 0.313 / -0.222                                                  |

**Table S3** Atomic coordinates of the optimized structure of Acebutolol

| Center number* | Atomic number | Atomic type | Coordinates (Å) |           |           |
|----------------|---------------|-------------|-----------------|-----------|-----------|
|                |               |             | X               | Y         | Z         |
| 1              | 6             | 0           | -0.371388       | -1.059699 | -0.064648 |
| 2              | 6             | 0           | 0.29263         | 0.198156  | -0.005444 |
| 3              | 6             | 0           | 1.691455        | 0.236284  | -0.130828 |
| 4              | 1             | 0           | 2.216862        | 1.177419  | -0.084837 |
| 5              | 6             | 0           | 2.447861        | -0.921055 | -0.331089 |
| 6              | 6             | 0           | 1.778369        | -2.147733 | -0.39792  |
| 7              | 1             | 0           | 2.339482        | -3.067283 | -0.554085 |
| 8              | 6             | 0           | 0.397406        | -2.217274 | -0.264227 |
| 9              | 1             | 0           | -0.07939        | -3.187342 | -0.316022 |
| 10             | 8             | 0           | -1.71495        | -1.099014 | 0.09091   |
| 11             | 6             | 0           | -2.393415       | -2.359226 | 0.01689   |
| 12             | 1             | 0           | -1.987053       | -3.049982 | 0.765866  |
| 13             | 1             | 0           | -2.250364       | -2.790478 | -0.985314 |
| 14             | 6             | 0           | -3.885822       | -2.163018 | 0.301006  |
| 15             | 1             | 0           | -4.357128       | -3.117549 | 0.020444  |
| 16             | 8             | 0           | -4.123708       | -1.941427 | 1.672313  |
| 17             | 1             | 0           | -4.257928       | -0.965375 | 1.715318  |
| 18             | 6             | 0           | -4.532821       | -1.025949 | -0.531647 |
| 19             | 1             | 0           | -4.136034       | -1.037796 | -1.560614 |
| 20             | 1             | 0           | -5.610622       | -1.219244 | -0.595755 |
| 21             | 7             | 0           | -4.350266       | 0.236046  | 0.178056  |
| 22             | 1             | 0           | -3.379878       | 0.544995  | 0.097871  |
| 23             | 6             | 0           | -5.254131       | 1.334245  | -0.193217 |
| 24             | 1             | 0           | -6.277944       | 0.944225  | -0.093472 |
| 25             | 6             | 0           | -5.062519       | 1.828806  | -1.638577 |
| 26             | 1             | 0           | -5.218112       | 1.022328  | -2.364347 |
| 27             | 1             | 0           | -4.046054       | 2.217762  | -1.775282 |
| 28             | 1             | 0           | -5.769781       | 2.632395  | -1.877695 |
| 29             | 6             | 0           | -5.068755       | 2.476937  | 0.810992  |
| 30             | 1             | 0           | -5.750922       | 3.306737  | 0.59285   |
| 31             | 1             | 0           | -4.041521       | 2.857512  | 0.767715  |
| 32             | 1             | 0           | -5.258952       | 2.126777  | 1.830855  |
| 33             | 6             | 0           | -0.43388        | 1.495568  | 0.160309  |
| 34             | 8             | 0           | -1.650716       | 1.595444  | 0.061138  |
| 35             | 6             | 0           | 0.379769        | 2.751802  | 0.44793   |
| 36             | 1             | 0           | -0.320536       | 3.566098  | 0.640864  |
| 37             | 1             | 0           | 1.010403        | 3.022596  | -0.406882 |
| 38             | 1             | 0           | 1.040548        | 2.621084  | 1.311431  |
| 39             | 7             | 0           | 3.854634        | -0.920776 | -0.46773  |
| 40             | 1             | 0           | 4.271043        | -1.8334   | -0.593455 |
| 41             | 6             | 0           | 4.722503        | 0.147849  | -0.480536 |
| 42             | 8             | 0           | 4.369399        | 1.311956  | -0.33376  |

|    |   |   |          |           |           |
|----|---|---|----------|-----------|-----------|
| 43 | 6 | 0 | 6.183235 | -0.232711 | -0.731374 |
| 44 | 1 | 0 | 6.346093 | -0.175239 | -1.817085 |
| 45 | 1 | 0 | 6.368727 | -1.276393 | -0.442064 |
| 46 | 6 | 0 | 7.163514 | 0.704697  | -0.013666 |
| 47 | 1 | 0 | 6.920143 | 1.733941  | -0.297573 |
| 48 | 1 | 0 | 8.175051 | 0.497658  | -0.384518 |
| 49 | 6 | 0 | 7.131043 | 0.568483  | 1.511567  |
| 50 | 1 | 0 | 6.14185  | 0.822391  | 1.907704  |
| 51 | 1 | 0 | 7.858088 | 1.240933  | 1.979938  |
| 52 | 1 | 0 | 7.372832 | -0.454317 | 1.827926  |

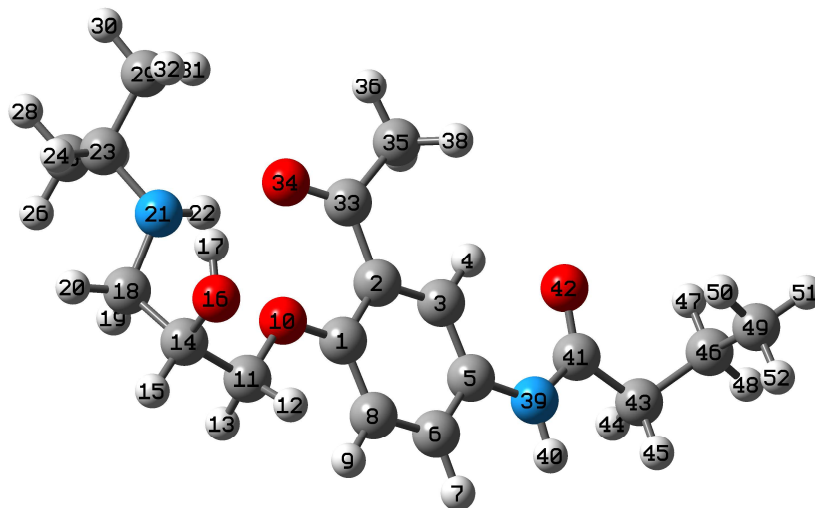

Local minimum structure of Acebutolol

\*The atoms are numbered in an entirely different manner than what is seen in the case of the ion-pair (either crystal or optimized structures). Here, the numbers are presented based on the results of the Gaussian program of the shown local minimum structure.



**Table S4** Atomic coordinates of the optimized structure of mono-protonated Acebutolol ion.

| Center number* | Atomic number | Atomic type | Coordinates (Å) |           |           |
|----------------|---------------|-------------|-----------------|-----------|-----------|
|                |               |             | X               | Y         | Z         |
| 1              | 6             | 0           | -0.392224       | -1.122229 | -0.075589 |
| 2              | 6             | 0           | 0.261447        | 0.138996  | -0.059732 |
| 3              | 6             | 0           | 1.663868        | 0.173332  | -0.164317 |
| 4              | 1             | 0           | 2.19196         | 1.113777  | -0.153585 |
| 5              | 6             | 0           | 2.427646        | -0.991107 | -0.295461 |
| 6              | 6             | 0           | 1.756114        | -2.220434 | -0.319959 |
| 7              | 1             | 0           | 2.317137        | -3.146234 | -0.423482 |
| 8              | 6             | 0           | 0.371037        | -2.284961 | -0.210335 |
| 9              | 1             | 0           | -0.099868       | -3.259726 | -0.22776  |
| 10             | 8             | 0           | -1.756503       | -1.156997 | 0.054126  |
| 11             | 6             | 0           | -2.434377       | -2.400923 | -0.086954 |
| 12             | 1             | 0           | -2.097545       | -3.125462 | 0.663116  |
| 13             | 1             | 0           | -2.258235       | -2.81351  | -1.090294 |
| 14             | 6             | 0           | -3.92786        | -2.155691 | 0.117876  |
| 15             | 1             | 0           | -4.454946       | -3.031019 | -0.279818 |
| 16             | 8             | 0           | -4.194835       | -1.993435 | 1.514512  |
| 17             | 1             | 0           | -4.96228        | -2.52821  | 1.767861  |
| 18             | 6             | 0           | -4.451508       | -0.903993 | -0.621539 |
| 19             | 1             | 0           | -4.010221       | -0.799488 | -1.614009 |
| 20             | 1             | 0           | -5.539555       | -0.954384 | -0.719757 |
| 21             | 7             | 0           | -4.135415       | 0.314172  | 0.188055  |
| 22             | 1             | 0           | -4.25646        | 0.020611  | 1.168841  |
| 23             | 6             | 0           | -4.986907       | 1.546573  | -0.080504 |
| 24             | 1             | 0           | -6.024024       | 1.197716  | -0.013653 |
| 25             | 6             | 0           | -4.700954       | 2.084889  | -1.480433 |
| 26             | 1             | 0           | -4.940668       | 1.359421  | -2.264578 |
| 27             | 1             | 0           | -3.650831       | 2.37892   | -1.574267 |
| 28             | 1             | 0           | -5.319432       | 2.969873  | -1.655844 |
| 29             | 6             | 0           | -4.709665       | 2.567146  | 1.022522  |
| 30             | 1             | 0           | -5.34655        | 3.443542  | 0.872097  |
| 31             | 1             | 0           | -3.664675       | 2.889472  | 0.999345  |
| 32             | 1             | 0           | -4.934901       | 2.161887  | 2.016102  |
| 33             | 6             | 0           | -0.457848       | 1.434858  | 0.037529  |
| 34             | 8             | 0           | -1.692145       | 1.523762  | 0.045195  |
| 35             | 6             | 0           | 0.340888        | 2.720415  | 0.119657  |
| 36             | 1             | 0           | -0.356548       | 3.552311  | 0.225448  |
| 37             | 1             | 0           | 0.945236        | 2.872267  | -0.781526 |
| 38             | 1             | 0           | 1.029139        | 2.711316  | 0.971441  |
| 39             | 7             | 0           | 3.827653        | -0.985823 | -0.403623 |
| 40             | 1             | 0           | 4.262244        | -1.895553 | -0.483607 |
| 41             | 6             | 0           | 4.682457        | 0.10614   | -0.437412 |
| 42             | 8             | 0           | 4.287416        | 1.259645  | -0.342037 |

|    |   |   |           |           |           |
|----|---|---|-----------|-----------|-----------|
| 43 | 6 | 0 | 6.151107  | -0.251563 | -0.642153 |
| 44 | 1 | 0 | 6.327511  | -0.249438 | -1.727402 |
| 45 | 1 | 0 | 6.351528  | -1.274563 | -0.295485 |
| 46 | 6 | 0 | 7.101991  | 0.742927  | 0.039121  |
| 47 | 1 | 0 | 6.845705  | 1.751872  | -0.300533 |
| 48 | 1 | 0 | 8.119903  | 0.535492  | -0.311221 |
| 49 | 6 | 0 | 7.055951  | 0.680416  | 1.568678  |
| 50 | 1 | 0 | 6.059113  | 0.934115  | 1.946536  |
| 51 | 1 | 0 | 7.765316  | 1.389264  | 2.008248  |
| 52 | 1 | 0 | 7.31644   | -0.319991 | 1.936542  |
| 53 | 1 | 0 | -3.118579 | 0.564753  | 0.089889  |

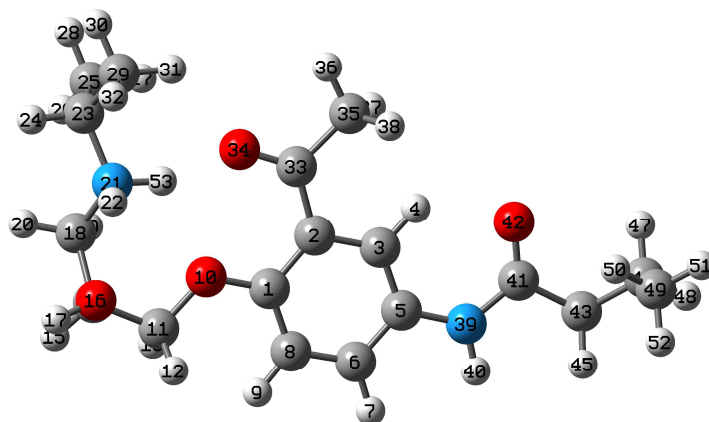

Local minimum structure of mono-protonated Acebutolol ion

\*The atoms are numbered in an entirely different manner than what is seen in the case of the ion-pair (either crystal or optimized structures). Here, the numbers are presented based on the results of the Gaussian program of the shown local minimum structure.

**Table S5** Atomic coordinates of the optimized structure of mono-negatively tetraphenyl borate ion

| Center number* | Atomic number | Atomic type | Coordinates (Å) |           |           |
|----------------|---------------|-------------|-----------------|-----------|-----------|
|                |               |             | X               | Y         | Z         |
| 1              | 5             | 0           | 0.00002         | -0.000087 | -0.000085 |
| 2              | 6             | 0           | 0.982335        | -1.195079 | -0.602752 |
| 3              | 6             | 0           | 0.805348        | -1.818548 | -1.8526   |
| 4              | 1             | 0           | -0.01369        | -1.496017 | -2.490394 |
| 5              | 6             | 0           | 1.647229        | -2.835814 | -2.315841 |
| 6              | 1             | 0           | 1.467308        | -3.281574 | -3.293988 |
| 7              | 6             | 0           | 2.715325        | -3.277849 | -1.535352 |
| 8              | 1             | 0           | 3.373958        | -4.068957 | -1.890817 |
| 9              | 6             | 0           | 2.927792        | -2.68035  | -0.290211 |
| 10             | 1             | 0           | 3.759821        | -3.004233 | 0.334659  |
| 11             | 6             | 0           | 2.081209        | -1.662327 | 0.152704  |
| 12             | 1             | 0           | 2.281879        | -1.202973 | 1.118976  |
| 13             | 6             | 0           | -0.982452       | 0.601393  | -1.195528 |
| 14             | 6             | 0           | -0.807216       | 1.851913  | -1.818132 |
| 15             | 1             | 0           | 0.010449        | 2.490966  | -1.494545 |
| 16             | 6             | 0           | -1.649139       | 2.314244  | -2.835762 |
| 17             | 1             | 0           | -1.470605       | 3.292974  | -3.280812 |
| 18             | 6             | 0           | -2.715552       | 1.532124  | -3.279005 |
| 19             | 1             | 0           | -3.37421        | 1.886881  | -4.070405 |
| 20             | 6             | 0           | -2.926293       | 0.286291  | -2.682327 |
| 21             | 1             | 0           | -3.756964       | -0.339889 | -3.007153 |
| 22             | 6             | 0           | -2.079711       | -0.15569  | -1.663902 |
| 23             | 1             | 0           | -2.279          | -1.122602 | -1.205281 |
| 24             | 6             | 0           | 0.980637        | 1.196628  | 0.60186   |
| 25             | 6             | 0           | 0.80371         | 1.819301  | 1.852123  |
| 26             | 1             | 0           | -0.014119       | 1.494981  | 2.49061   |
| 27             | 6             | 0           | 1.643974        | 2.838136  | 2.314802  |
| 28             | 1             | 0           | 1.464162        | 3.283198  | 3.293291  |
| 29             | 6             | 0           | 2.710337        | 3.282615  | 1.533325  |
| 30             | 1             | 0           | 3.367745        | 4.074917  | 1.88839   |
| 31             | 6             | 0           | 2.92269         | 2.686003  | 0.28774   |
| 32             | 1             | 0           | 3.753372        | 3.011795  | -0.337921 |
| 33             | 6             | 0           | 2.077772        | 1.666343  | -0.154598 |
| 34             | 1             | 0           | 2.278311        | 1.207824  | -1.121271 |
| 35             | 6             | 0           | -0.980463       | -0.603227 | 1.19612   |
| 36             | 6             | 0           | -2.079266       | 0.151586  | 1.664619  |
| 37             | 1             | 0           | -2.281143       | 1.117684  | 1.205432  |
| 38             | 6             | 0           | -2.924253       | -0.291754 | 2.683789  |
| 39             | 1             | 0           | -3.756314       | 0.332584  | 3.008598  |
| 40             | 6             | 0           | -2.710181       | -1.536663 | 3.281206  |
| 41             | 1             | 0           | -3.367643       | -1.8925   | 4.073121  |
| 42             | 6             | 0           | -1.642068       | -2.316482 | 2.838023  |
| 43             | 1             | 0           | -1.460969       | -3.294463 | 3.283681  |
| 44             | 6             | 0           | -0.801737       | -1.852807 | 1.81969   |
| 45             | 1             | 0           | 0.017384        | -2.490097 | 1.496303  |

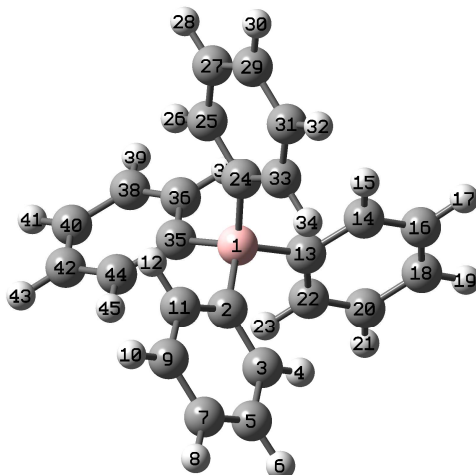

Local minimum structure of mono-negatively tetraphenyl borate ion

\*The atoms are numbered in an entirely different manner than what is seen in the case of the ion-pair (either crystal or optimized structures). Here, the numbers are presented based on the results of the Gaussian program of the shown local minimum structure.

**Table S6** Atomic coordinates of the optimized structure of Acebutolol–tetraphenyl borate ion-pair complex

| Center number* | Atomic number | Atomic type | Coordinates (Å) |           |           |
|----------------|---------------|-------------|-----------------|-----------|-----------|
|                |               |             | X               | Y         | Z         |
| 1              | 6             | 0           | -3.749167       | -0.772642 | 0.223113  |
| 2              | 6             | 0           | -4.592906       | 0.362749  | 0.080295  |
| 3              | 6             | 0           | -5.987039       | 0.182951  | 0.119517  |
| 4              | 1             | 0           | -6.65014        | 1.026675  | 0.011511  |
| 5              | 6             | 0           | -6.564773       | -1.074423 | 0.310119  |
| 6              | 6             | 0           | -5.715553       | -2.177727 | 0.459578  |
| 7              | 1             | 0           | -6.133747       | -3.170624 | 0.611361  |
| 8              | 6             | 0           | -4.334597       | -2.031246 | 0.415542  |
| 9              | 1             | 0           | -3.718126       | -2.913571 | 0.528434  |
| 10             | 8             | 0           | -2.40181        | -0.600839 | 0.159608  |
| 11             | 6             | 0           | -1.545807       | -1.707439 | 0.461913  |
| 12             | 1             | 0           | -1.722148       | -2.535702 | -0.233063 |
| 13             | 1             | 0           | -1.742362       | -2.045092 | 1.488753  |
| 14             | 6             | 0           | -0.089563       | -1.27531  | 0.321252  |
| 15             | 1             | 0           | 0.502151        | -2.03514  | 0.845839  |
| 16             | 8             | 0           | 0.258968        | -1.233795 | -1.05409  |
| 17             | 1             | 0           | 1.167964        | -1.591617 | -1.149423 |
| 18             | 6             | 0           | 0.237799        | 0.081742  | 0.976616  |
| 19             | 1             | 0           | -0.290354       | 0.221273  | 1.921296  |
| 20             | 1             | 0           | 1.313441        | 0.161366  | 1.152789  |
| 21             | 7             | 0           | -0.144835       | 1.191182  | 0.042808  |
| 22             | 1             | 0           | -1.180234       | 1.271072  | -0.000765 |
| 23             | 1             | 0           | 0.175153        | 0.875445  | -0.886713 |
| 24             | 6             | 0           | 0.459353        | 2.55874   | 0.334335  |
| 25             | 1             | 0           | 1.536624        | 2.42318   | 0.206684  |
| 26             | 6             | 0           | 0.138005        | 2.98526   | 1.764939  |
| 27             | 1             | 0           | 0.609727        | 2.334222  | 2.506405  |
| 28             | 1             | 0           | -0.944472       | 3.010336  | 1.936826  |
| 29             | 1             | 0           | 0.526126        | 3.996084  | 1.923806  |
| 30             | 6             | 0           | -0.06792        | 3.546761  | -0.705381 |
| 31             | 1             | 0           | 0.443845        | 4.504302  | -0.572442 |
| 32             | 1             | 0           | -1.145021       | 3.700043  | -0.592949 |
| 33             | 1             | 0           | 0.147894        | 3.205486  | -1.721728 |
| 34             | 6             | 0           | -4.069318       | 1.747031  | -0.078537 |
| 35             | 8             | 0           | -2.868483       | 2.017629  | -0.043876 |
| 36             | 6             | 0           | -5.053587       | 2.88783   | -0.278089 |
| 37             | 1             | 0           | -4.483515       | 3.809756  | -0.400866 |
| 38             | 1             | 0           | -5.725468       | 2.99198   | 0.581041  |
| 39             | 1             | 0           | -5.680196       | 2.727271  | -1.162102 |
| 40             | 7             | 0           | -7.957254       | -1.289403 | 0.360601  |
| 41             | 1             | 0           | -8.240192       | -2.252414 | 0.482322  |
| 42             | 6             | 0           | -8.974682       | -0.358361 | 0.29959   |
| 43             | 8             | 0           | -8.78073        | 0.841061  | 0.148013  |
| 44             | 6             | 0           | -10.375418      | -0.943746 | 0.475103  |
| 45             | 1             | 0           | -10.607744      | -0.893126 | 1.548454  |

|    |   |   |            |           |           |
|----|---|---|------------|-----------|-----------|
| 46 | 1 | 0 | -10.389617 | -2.007948 | 0.202343  |
| 47 | 6 | 0 | -11.437736 | -0.171389 | -0.319223 |
| 48 | 1 | 0 | -11.363766 | 0.887199  | -0.04894  |
| 49 | 1 | 0 | -12.427468 | -0.517686 | 0.002492  |
| 50 | 6 | 0 | -11.298955 | -0.329141 | -1.836285 |
| 51 | 1 | 0 | -10.335351 | 0.057003  | -2.186481 |
| 52 | 1 | 0 | -12.086455 | 0.223468  | -2.359875 |
| 53 | 1 | 0 | -11.374834 | -1.381376 | -2.138613 |
| 54 | 5 | 0 | 4.600109   | -0.274206 | -0.038938 |
| 55 | 6 | 0 | 4.156965   | -1.6887   | -0.798165 |
| 56 | 6 | 0 | 4.797293   | -2.106406 | -1.983952 |
| 57 | 1 | 0 | 5.645729   | -1.534534 | -2.348884 |
| 58 | 6 | 0 | 4.394971   | -3.229305 | -2.709466 |
| 59 | 1 | 0 | 4.928506   | -3.501772 | -3.61813  |
| 60 | 6 | 0 | 3.319752   | -4.008433 | -2.276113 |
| 61 | 1 | 0 | 3.008008   | -4.887336 | -2.835353 |
| 62 | 6 | 0 | 2.668474   | -3.645795 | -1.098153 |
| 63 | 1 | 0 | 1.848731   | -4.25539  | -0.718689 |
| 64 | 6 | 0 | 3.084527   | -2.509393 | -0.386713 |
| 65 | 1 | 0 | 2.599244   | -2.290654 | 0.562472  |
| 66 | 6 | 0 | 6.256696   | -0.149679 | -0.050253 |
| 67 | 6 | 0 | 7.068305   | -0.593371 | 1.011697  |
| 68 | 1 | 0 | 6.600891   | -0.989184 | 1.909219  |
| 69 | 6 | 0 | 8.463831   | -0.537348 | 0.968598  |
| 70 | 1 | 0 | 9.043749   | -0.891501 | 1.819352  |
| 71 | 6 | 0 | 9.11472    | -0.026054 | -0.154494 |
| 72 | 1 | 0 | 10.200965  | 0.021731  | -0.192215 |
| 73 | 6 | 0 | 8.345417   | 0.429359  | -1.225679 |
| 74 | 1 | 0 | 8.830128   | 0.838301  | -2.110703 |
| 75 | 6 | 0 | 6.950872   | 0.368771  | -1.164611 |
| 76 | 1 | 0 | 6.383995   | 0.748938  | -2.011759 |
| 77 | 6 | 0 | 4.060182   | -0.237329 | 1.532666  |
| 78 | 6 | 0 | 3.588462   | 0.927469  | 2.174857  |
| 79 | 1 | 0 | 3.545437   | 1.857889  | 1.614531  |
| 80 | 6 | 0 | 3.196288   | 0.953887  | 3.519135  |
| 81 | 1 | 0 | 2.861819   | 1.889571  | 3.96591   |
| 82 | 6 | 0 | 3.253749   | -0.205523 | 4.292647  |
| 83 | 1 | 0 | 2.952752   | -0.192511 | 5.33786   |
| 84 | 6 | 0 | 3.726175   | -1.378636 | 3.700896  |
| 85 | 1 | 0 | 3.79815    | -2.293046 | 4.287278  |
| 86 | 6 | 0 | 4.119738   | -1.383184 | 2.360077  |
| 87 | 1 | 0 | 4.494632   | -2.313413 | 1.939905  |
| 88 | 6 | 0 | 3.968433   | 0.992035  | -0.912592 |
| 89 | 6 | 0 | 4.404399   | 2.319233  | -0.693125 |
| 90 | 1 | 0 | 5.16954    | 2.498847  | 0.058838  |
| 91 | 6 | 0 | 3.932777   | 3.406259  | -1.43372  |
| 92 | 1 | 0 | 4.31566    | 4.405034  | -1.231502 |
| 93 | 6 | 0 | 2.999665   | 3.210391  | -2.455636 |
| 94 | 1 | 0 | 2.651619   | 4.048115  | -3.056097 |
| 95 | 6 | 0 | 2.544073   | 1.915119  | -2.707695 |

|    |   |   |          |           |           |
|----|---|---|----------|-----------|-----------|
| 96 | 1 | 0 | 1.843741 | 1.732194  | -3.522141 |
| 97 | 6 | 0 | 3.017656 | 0.840248  | -1.943196 |
| 98 | 1 | 0 | 2.676175 | -0.158531 | -2.20114  |

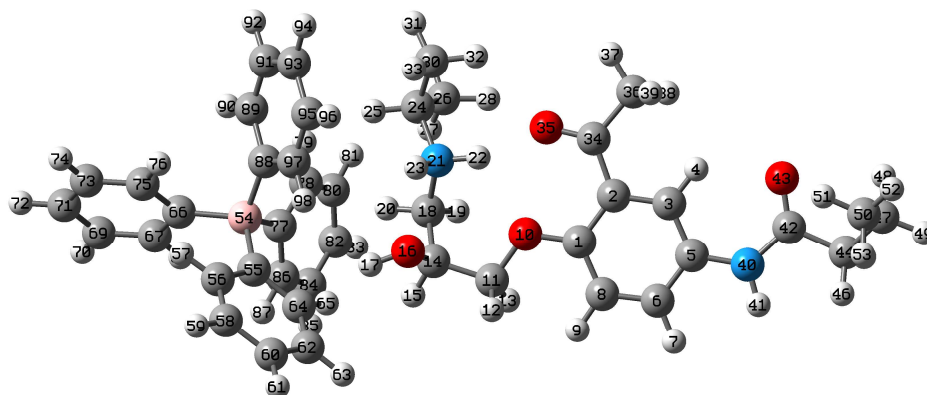

Local minimum structure of Acebutolol-tetraphenyl borate ion-pair complex

\*The atoms are numbered in an entirely different manner than what is seen in the case of crystal structure. Here, the numbers are presented based on the results of the Gaussian program of the shown local minimum structure.

**Table S7** Comparison of the calculated bond lengths for the protonated, ion-pair, and free form of the acebutolol framework

| Bond length (Å)* | Acebutolol | mono-protonated<br>Acebutolol ion | Ion-pair |
|------------------|------------|-----------------------------------|----------|
| C1-C2            | 1.42360    | 1.42064                           | 1.42176  |
| C2-C3            | 1.40495    | 1.40673                           | 1.40623  |
| C3-C5            | 1.39703    | 1.39874                           | 1.39682  |
| C5-C6            | 1.39908    | 1.40100                           | 1.40028  |
| C6-C8            | 1.38916    | 1.39091                           | 1.38940  |
| C1-C8            | 1.40387    | 1.39738                           | 1.40137  |
| C1-O10           | 1.35311    | 1.37087                           | 1.35975  |
| O10-C11          | 1.43315    | 1.42365                           | 1.43133  |
| C11-C14          | 1.53183    | 1.52728                           | 1.52551  |
| C14-O16          | 1.40932    | 1.43115                           | 1.41942  |
| C14-C18          | 1.55076    | 1.54522                           | 1.54216  |
| C18-N21          | 1.45933    | 1.49642                           | 1.49975  |
| N21-C23          | 1.46999    | 1.52183                           | 1.52324  |
| C23-C25          | 1.53960    | 1.52688                           | 1.52703  |
| C23-C29          | 1.53250    | 1.52810                           | 1.52814  |
| C2-C33           | 1.49618    | 1.48530                           | 1.48849  |
| C33-O34          | 1.22495    | 1.23752                           | 1.23143  |
| C33-C35          | 1.52410    | 1.51571                           | 1.51988  |
| C5-N39           | 1.41339    | 1.40419                           | 1.40988  |
| N39-C41          | 1.37671    | 1.38716                           | 1.38048  |
| C41-O42          | 1.22530    | 1.22300                           | 1.22442  |
| C41-C43          | 1.53019    | 1.52539                           | 1.52825  |
| C43-C46          | 1.53453    | 1.53536                           | 1.53493  |
| C46-C49          | 1.53165    | 1.53153                           | 1.53154  |

\* The numbering of the atoms is according to the local minimum structure of Acebutolol given in Table S3.



**Table S8** Occupancy of natural orbitals (NBOs) and hybrids calculated for the mono-protonated Acebutolol ion (Selected).\*

| Bond orbital             | Occupancy | Polarization    | Hybrid <sup>e</sup>                        | AO (%) <sup>*</sup>            |
|--------------------------|-----------|-----------------|--------------------------------------------|--------------------------------|
| $\sigma(\text{C14-O16})$ | 0.99672   | 66.90%<br>(O16) | $\text{sp}^{4.03}\text{d}^{0.01}$<br>(C14) | 19.84% s, 4.03% p and 0.23% d  |
|                          |           |                 | $\text{sp}^{2.30}\text{d}^{0.00}$<br>(O16) | 30.24% s, 69.69% p and 0.08% d |
| $\sigma(\text{C14-C18})$ | 0.99133   | 51.14 (C18)     | $\text{sp}^{2.73}\text{d}^{0.00}$<br>(C14) | 26.78% s, 73.17% p and 0.06% d |
|                          |           |                 | $\text{sp}^{2.55}\text{d}^{0.00}$<br>(C18) | 28.17% s, 71.79% p and 0.05% d |
| $\sigma(\text{C18-N21})$ | 0.99495   | 63.65%<br>(N21) | $\text{sp}^{3.81}\text{d}^{0.01}$<br>(C18) | 20.75% s, 79.11% p and 0.14% d |
|                          |           |                 | $\text{sp}^{2.85}\text{d}^{0.00}$<br>(N21) | 25.99% s, 73.98% p and 0.03% d |
| $\sigma(\text{N21-C23})$ | 0.99323   | 65.38%<br>(N21) | $\text{sp}^{2.60}\text{d}^{0.00}$<br>(N21) | 27.81% s, 72.17% p and 0.02% d |
|                          |           |                 | $\text{sp}^{4.38}\text{d}^{0.01}$<br>(C23) | 18.78% s, 81.06% p and 0.16% d |
| $\sigma(\text{C23-C25})$ | 0.99296   | 51.89%<br>(C23) | $\text{sp}^{2.49}\text{d}^{0.00}$<br>(C23) | 28.67% s, 71.29% p and 0.04% d |
|                          |           |                 | $\text{sp}^{2.69}\text{d}^{0.00}$<br>(C25) | 27.09% p, 72.86% p and 0.05% d |
| $\sigma(\text{C23-C29})$ | 0.99202   | 52.17%<br>(C23) | $\text{sp}^{2.50}\text{d}^{0.00}$<br>(C23) | 28.57% s, 71.39% p and 0.04% d |
|                          |           |                 | $\text{sp}^{2.70}\text{d}^{0.00}$<br>(C29) | 27.02% s, 72.93% p and 0.05% d |
| LP(1)O16                 | 0.98909   |                 | $\text{sp}^{1.18}\text{d}^{0.00}$          | 45.95% s, 1.18% p and 0.00% d  |
| LP(2)O16                 | 0.97295   |                 | $\text{sp}^{41.44}\text{d}^{0.04}$         | 2.35% s, 97.56% p and 0.08% d  |

<sup>a</sup> Percentage contribution of atomic orbitals in NBO hybrid.

\* The numbering of the atoms is according to the local minimum structure of Acebutolol given in Table S4.

**Table S9** Occupancy of natural orbitals (NBOs) and hybrids calculated for the Acebutolol–tetraphenyl borate ion-pair complex (Selected).\*

| Bond orbital             | Occupancy | Polarization    | Hybrid <sup>e</sup>                        | AO (%) <sup>f</sup>            |
|--------------------------|-----------|-----------------|--------------------------------------------|--------------------------------|
| $\sigma(\text{C14-O16})$ | 0.99657   | 66.12%<br>(O16) | $\text{sp}^{3.87}\text{d}^{0.01}$<br>(C14) | 20.51% s, 79.27% p and 0.22% d |
|                          |           |                 | $\text{sp}^{2.39}\text{d}^{0.00}$<br>(O16) | 29.49% s, 70.43% p and 0.08% d |
| $\sigma(\text{C14-C18})$ | 0.99081   | 50.89%<br>(C18) | $\text{sp}^{2.69}\text{d}^{0.01}$<br>(C14) | 27.09% s, 72.78% p and 0.05% d |
|                          |           |                 | $\text{sp}^{2.57}\text{d}^{0.00}$<br>(C18) | 28.02% s, 71.93% p and 0.05% d |
| $\sigma(\text{C18-N21})$ | 0.99505   | 64.31%<br>(N21) | $\text{sp}^{3.97}\text{d}^{0.01}$<br>(C18) | 20.09% s, 79.77% p and 0.14% d |
|                          |           |                 | $\text{sp}^{2.81}\text{d}^{0.00}$<br>(N21) | 26.22% s, 73.75% p and 0.03% d |
| $\sigma(\text{N21-C24})$ | 0.99348   | 65.53%<br>(N21) | $\text{sp}^{2.58}\text{d}^{0.00}$<br>(N21) | 27.94% s, 72.04% p and 0.02% d |
|                          |           |                 | $\text{sp}^{4.38}\text{d}^{0.01}$<br>(C24) | 18.57% s, 81.27% p and 0.16% d |
| $\sigma(\text{C24-C26})$ | 0.99314   | 51.13%<br>(C24) | $\text{sp}^{2.56}\text{d}^{0.00}$<br>(C24) | 28.06% s, 71.89% p and 0.04% d |
|                          |           |                 | $\text{sp}^{2.64}\text{d}^{0.00}$<br>(C26) | 27.44% p, 72.52% p and 0.04% d |
| $\sigma(\text{C24-C30})$ | 0.99201   | 51.69%<br>(C24) | $\text{sp}^{2.56}\text{d}^{0.00}$<br>(C24) | 28.09% s, 71.89% p and 0.04% d |
|                          |           |                 | $\text{sp}^{2.69}\text{d}^{0.00}$<br>(C30) | 27.07% s, 72.89% p and 0.05% d |
| LP(1)O16                 | 0.98787   |                 | $\text{sp}^{1.20}\text{d}^{0.00}$          | 45.36% s, 54.58% p and 0.06% d |
| LP(2)O16                 | 0.96982   |                 | $\text{sp}^{99.99}\text{d}^{0.10}$         | 0.83% s, 99.09% p and 0.08% d  |

<sup>a</sup> Percentage contribution of atomic orbitals in NBO hybrid.

\* The numbering of the atoms is according to the local minimum structure of Acebutolol given in Table S6.

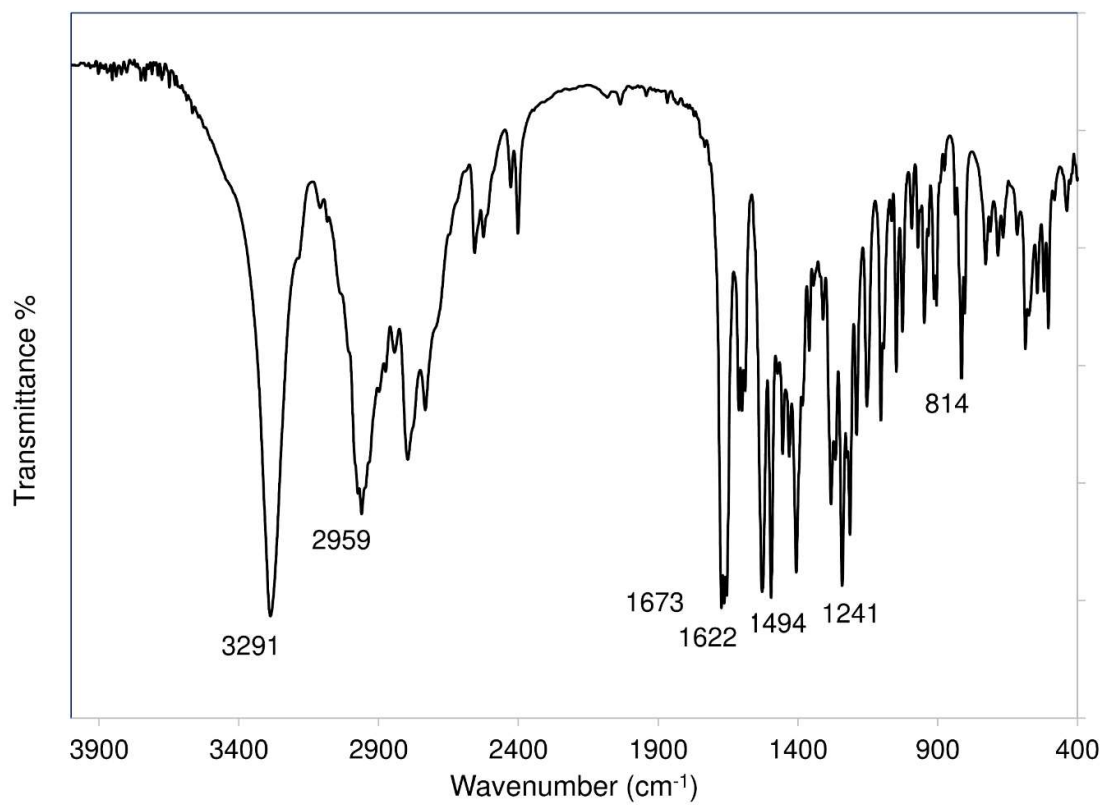

**Fig. S1** IR spectrum of Acebutolol hydrochloride.

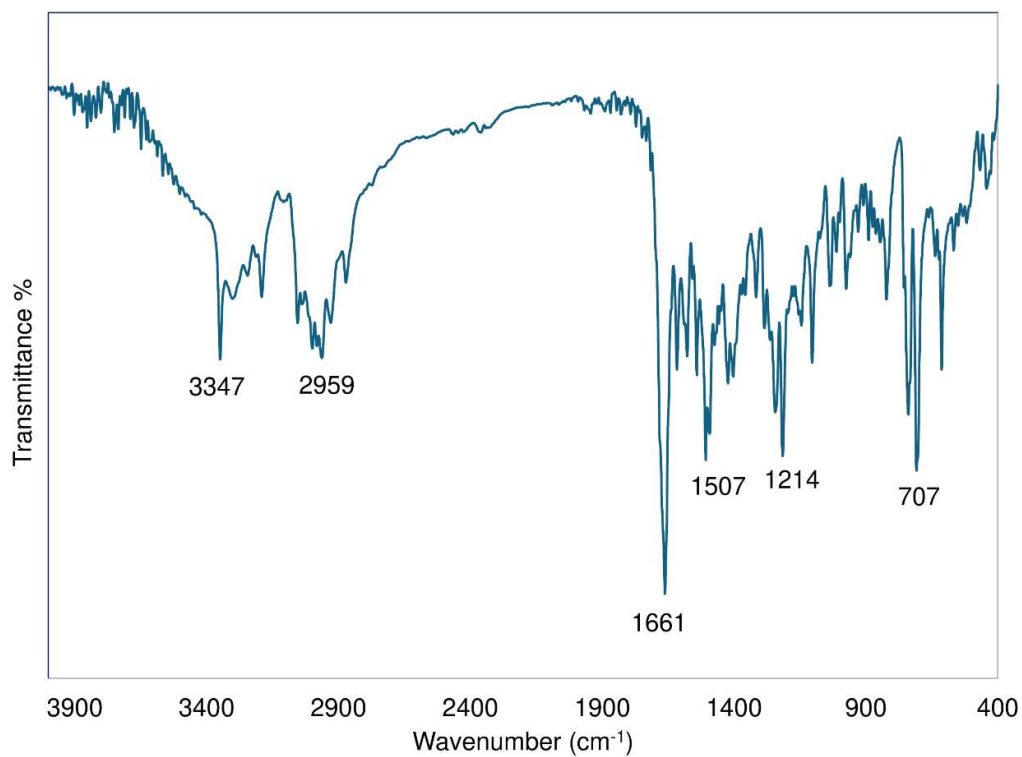

**Fig. S2** IR spectrum of Acebutolol-tetraphenyl borate ion-pair complex.

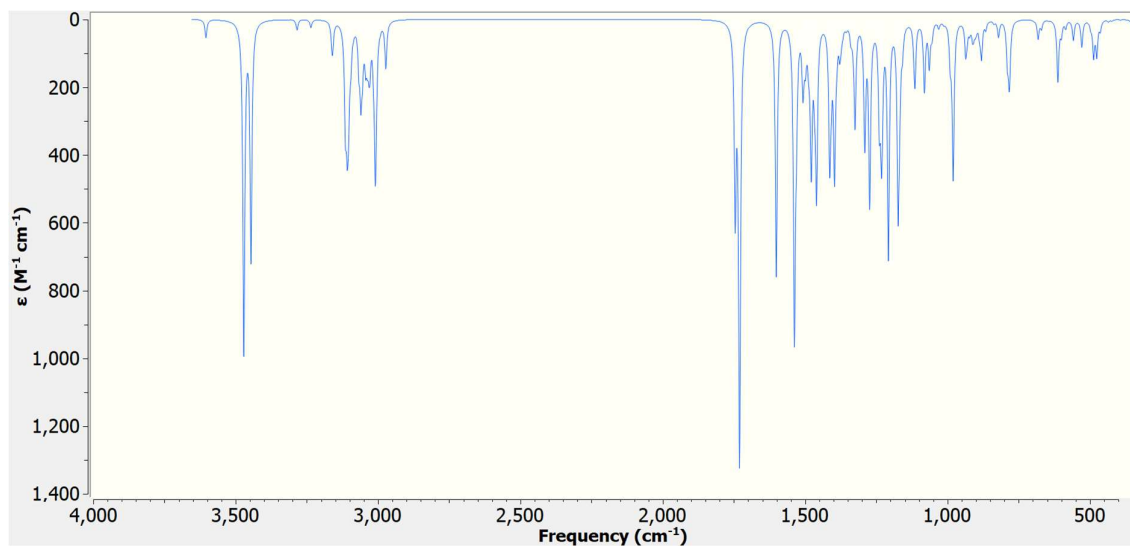

a)

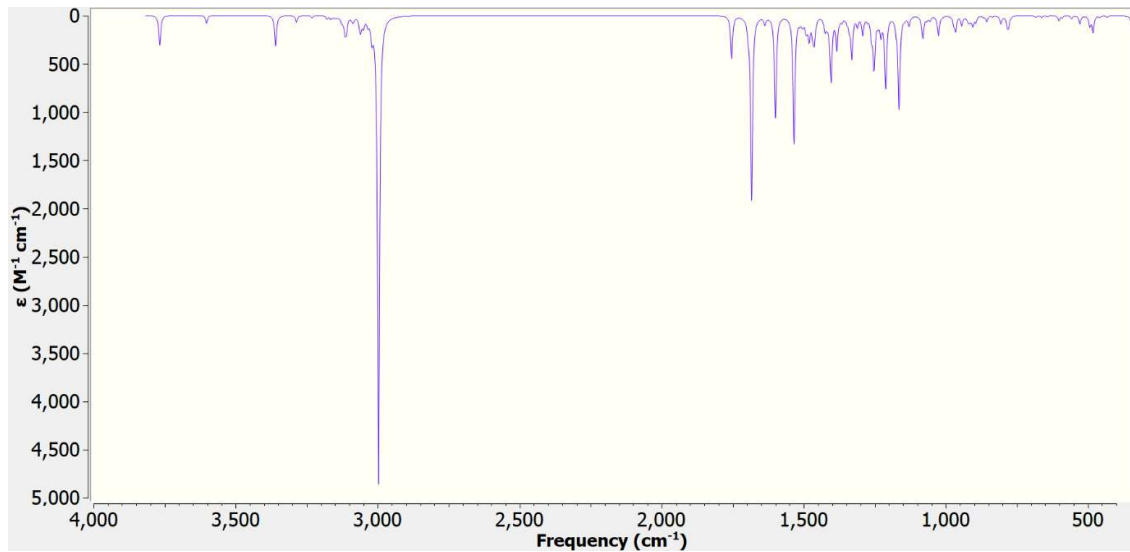

b)

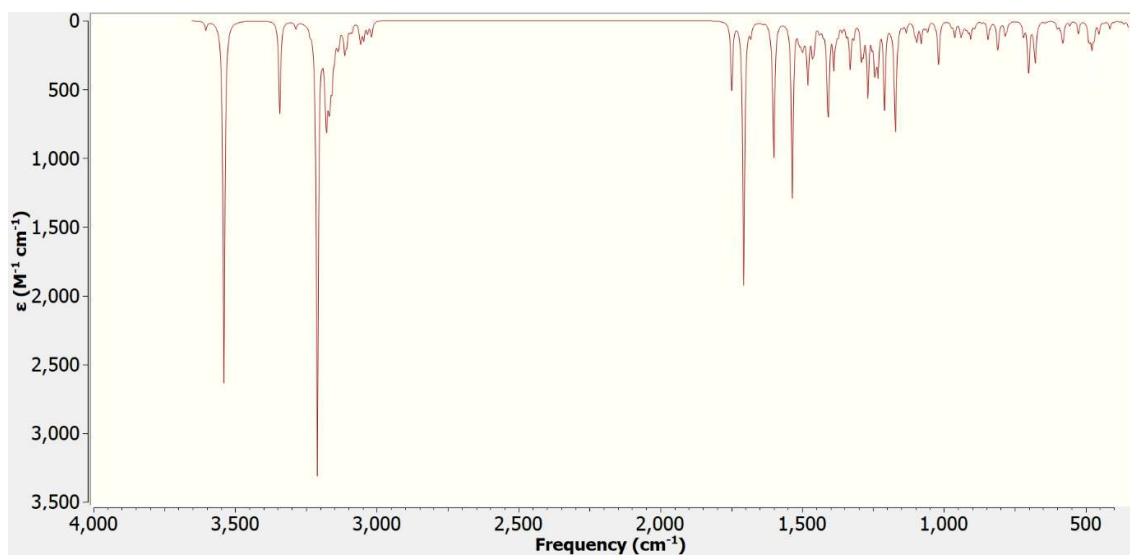

c)

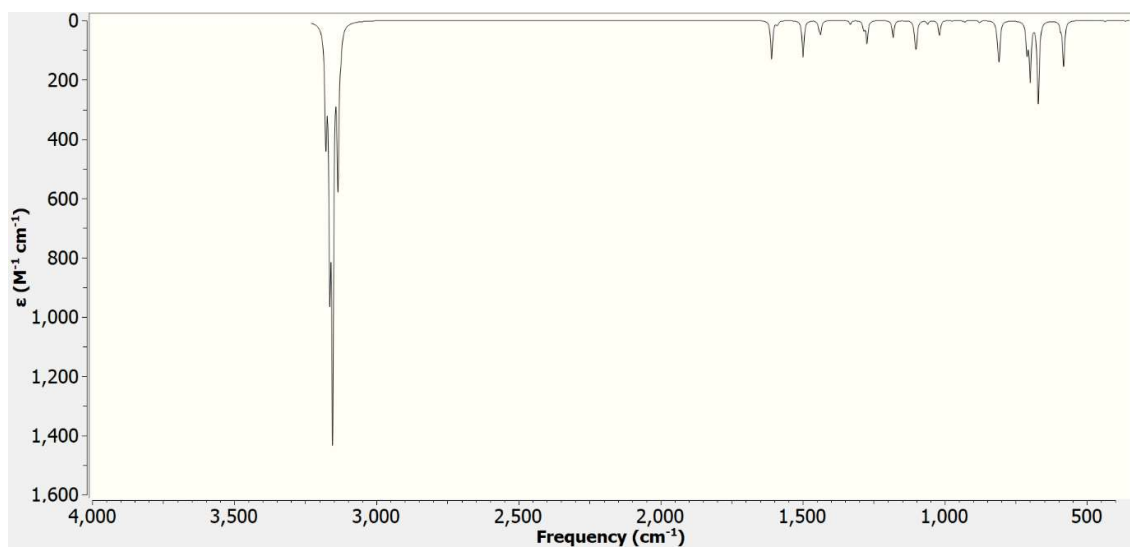

d)

**Fig. S3** Calculated IR spectra of **a)** Acebutolol, **b)** Mono-protonated Acebutolol, **c)** ion-pair complex and **d)** tetraphenyl borate ion.

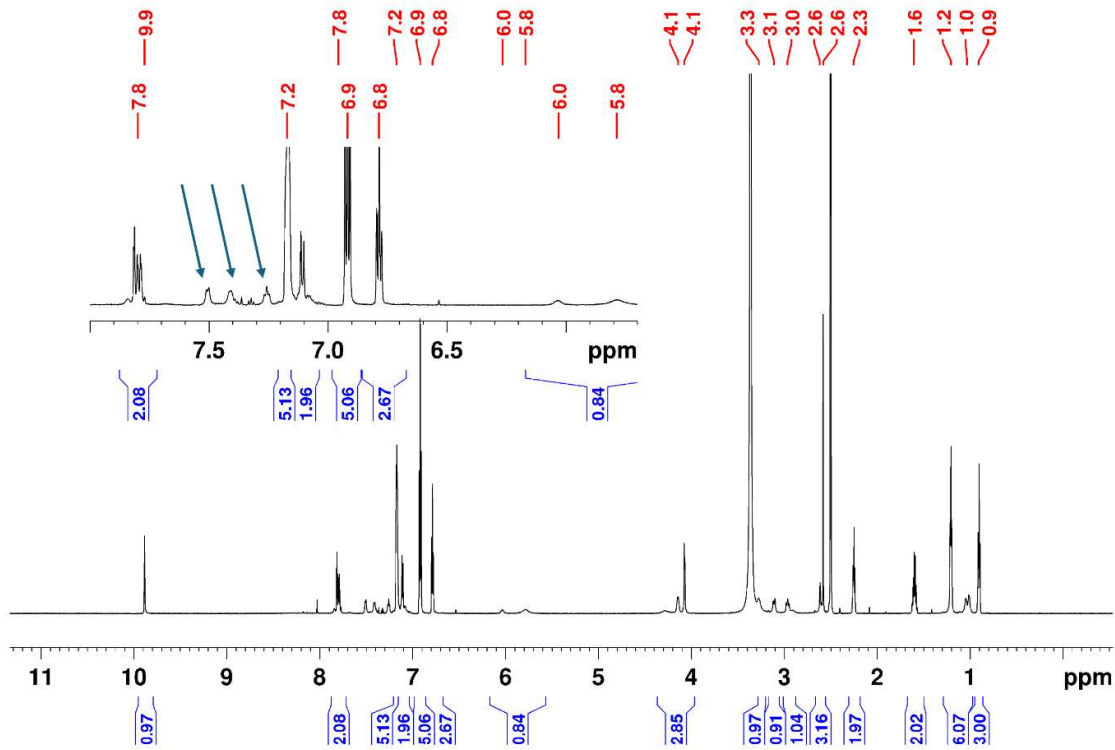

(a)

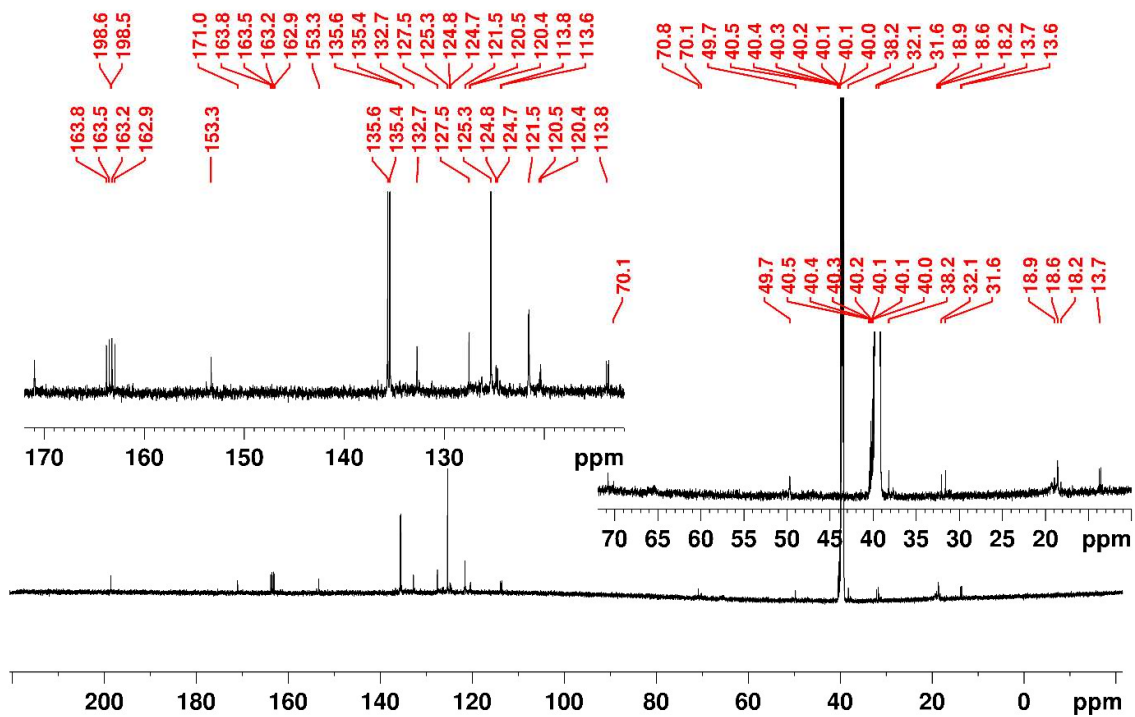

(b)

Fig. S4 NMR spectra of Acebutolol-tetraphenyl borate ion-pair; (a)  $^1\text{H}$  and (b)  $^{13}\text{C}$ .

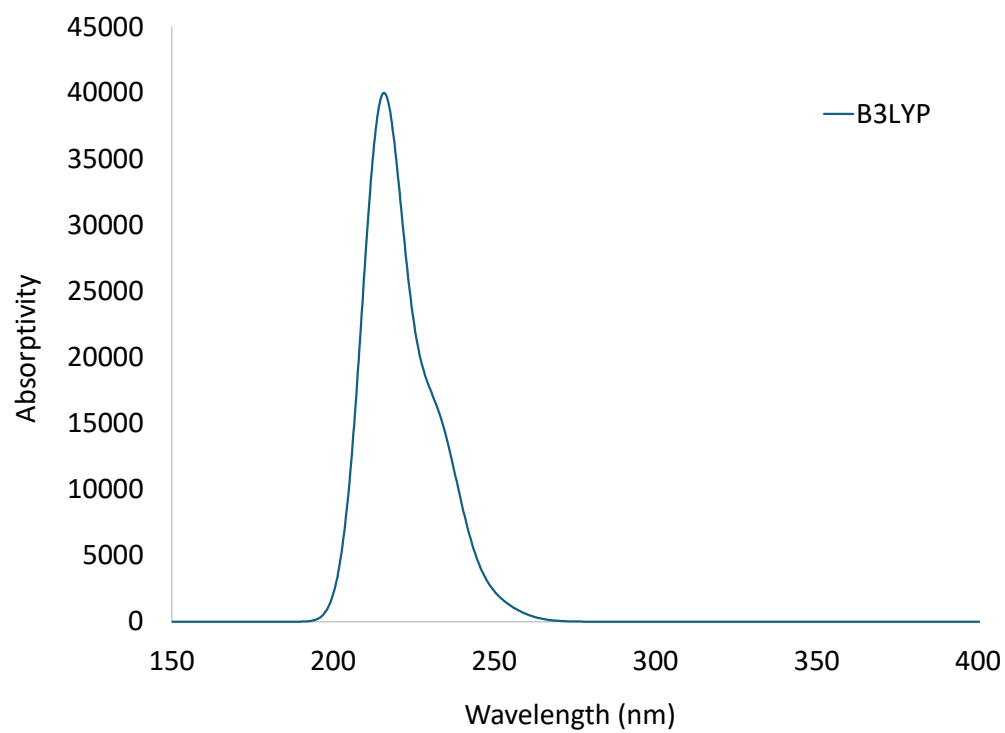

a)

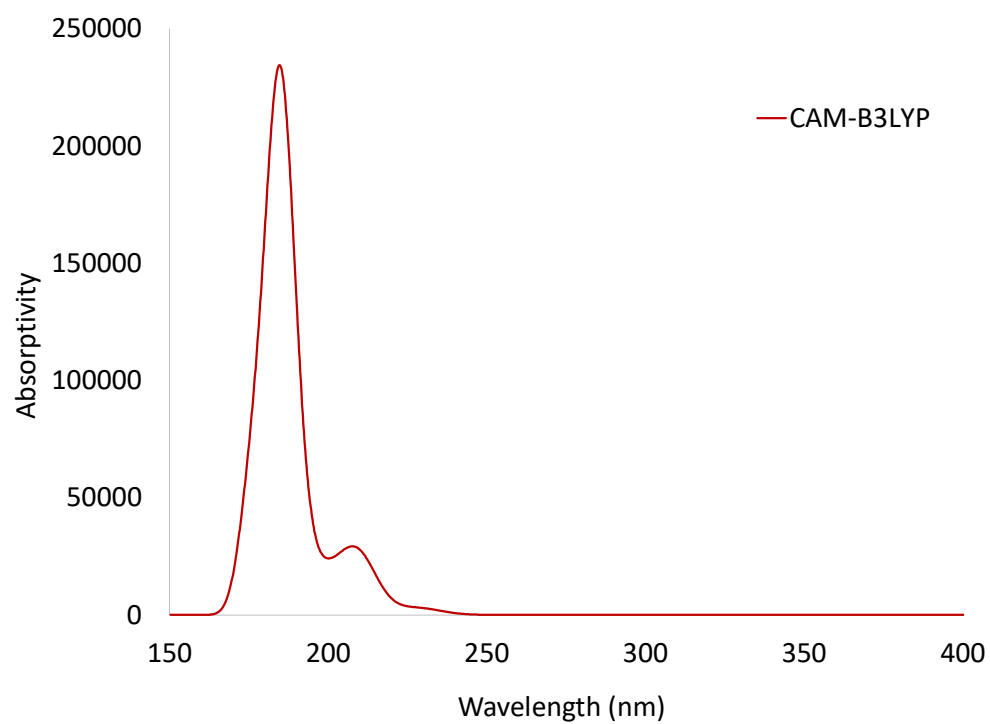

b)

**Fig. S5** Calculated electronic absorption spectra of tetraphenyl borate ion **a)** B3LYP/6-31G(d), and **b)** CAM-B3LYP/6-31G(d)



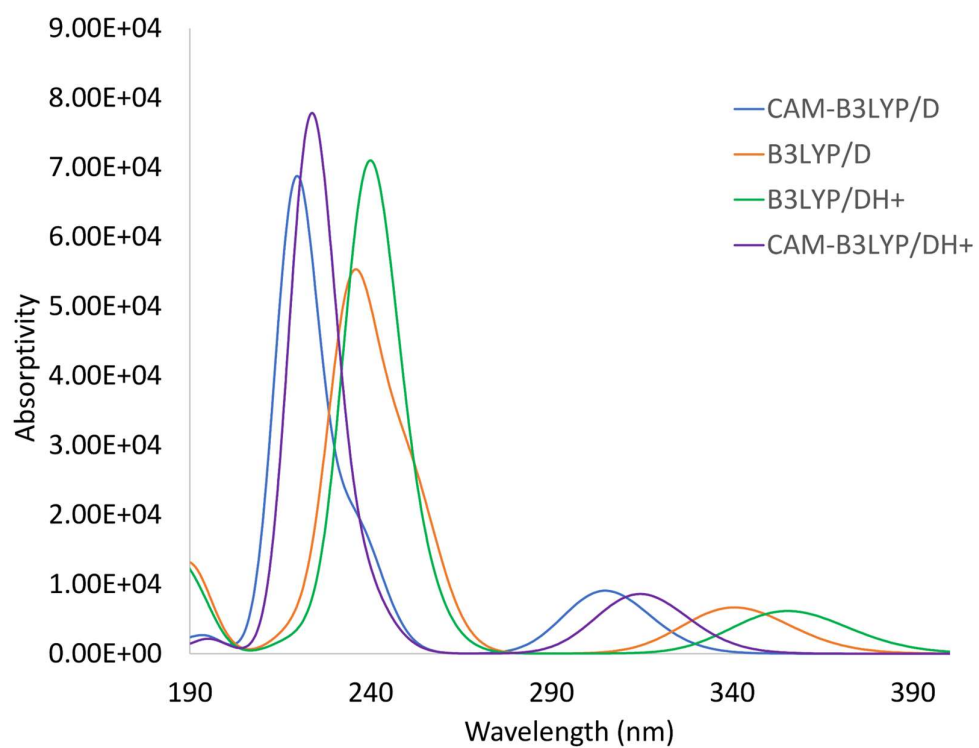

**Fig. S6** Calculated electronic absorption spectra of acebutolol (D) and its mono-protonated acebutolol (DH<sup>+</sup>) using **a**) B3LYP/6-31G(d), and **b**) CAM-B3LYP/6-31G(d)

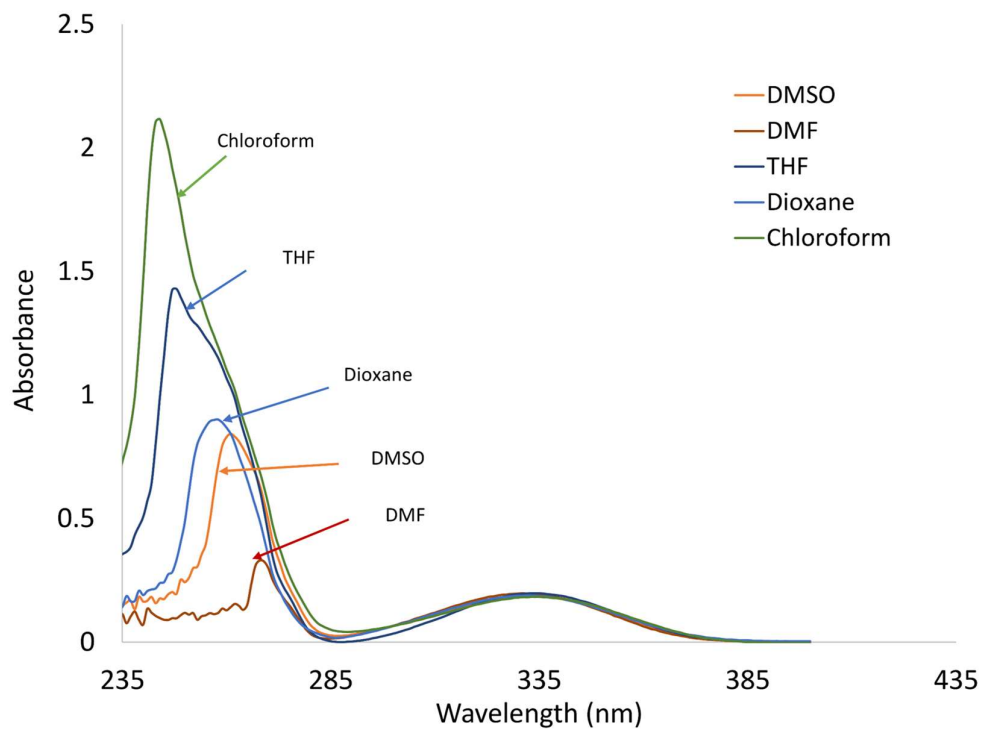

(a)

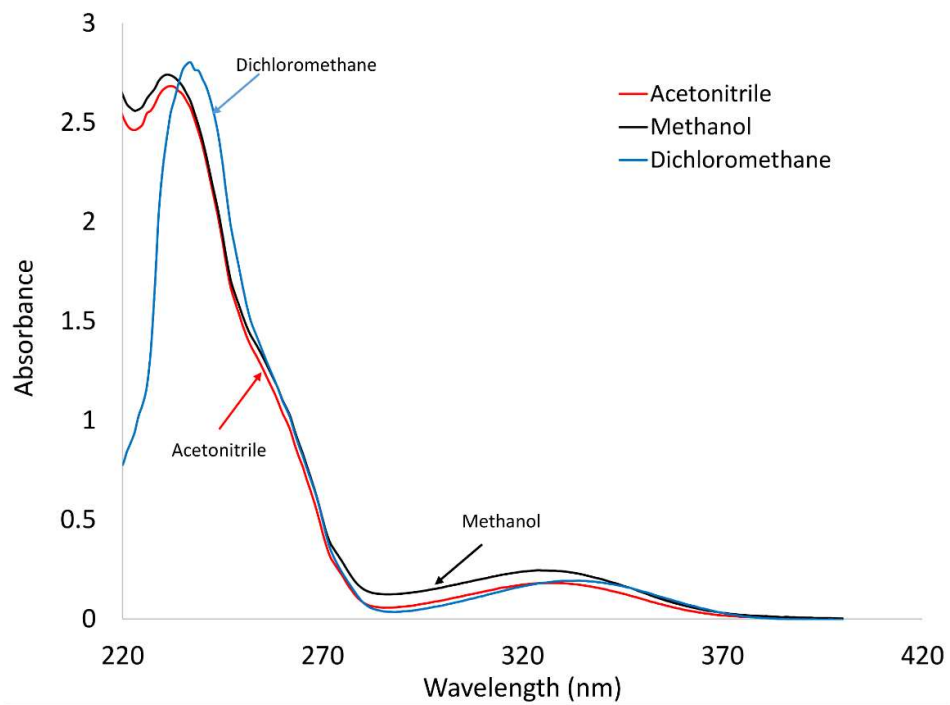

(b)

**Fig. S7** Electronic absorption spectra of Acebutolol-tetraphenyl borate ion-pair in different solvents; (a) DMSO, DMF, THF, Dioxane and chloroform; (b) Acetonitrile, methanol and dichloromethane.

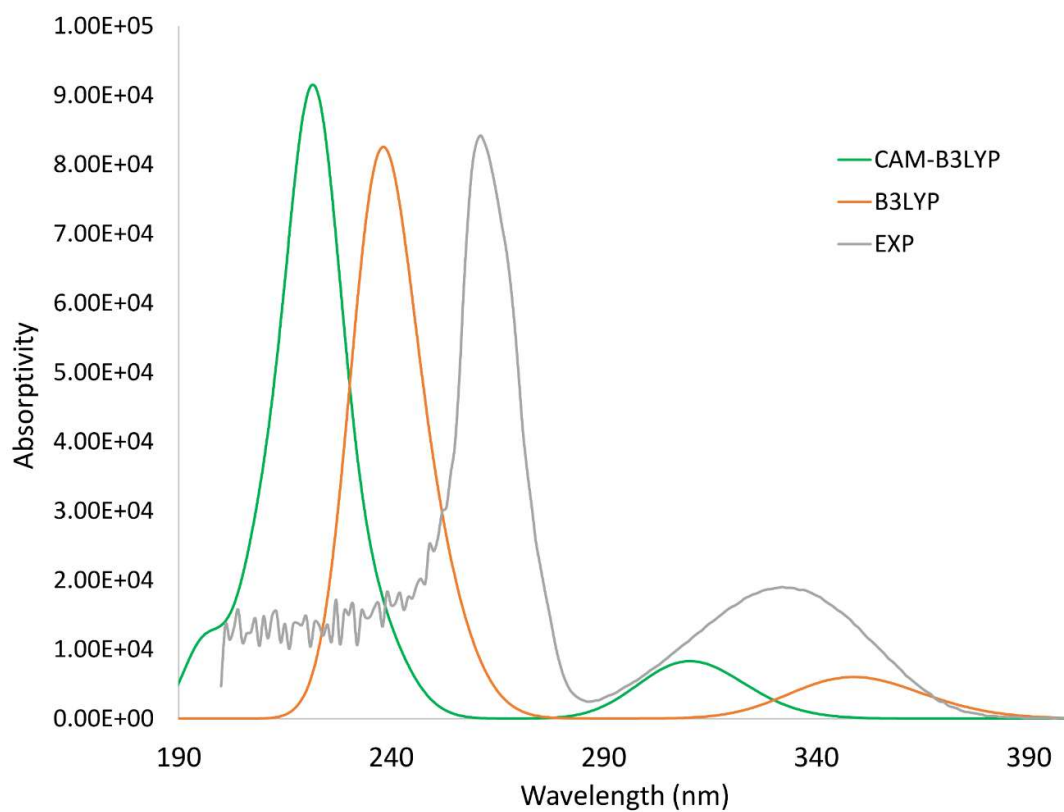

**Fig. S8** Comparison between the experimental (in DMSO) and calculated electronic absorption spectra of Acebutolol-tetraphenyl borate ion-pair (using B3LYP and CAM-B3LYP functional).

**Table S10** Selected experimental and theoretical chemical shifts of the ion-pair complex\*

| atom    | $\delta_{\text{calcd.}}$       |                                |                        |                        | $\delta_{\text{Exp}}$ |
|---------|--------------------------------|--------------------------------|------------------------|------------------------|-----------------------|
|         | B3LYP/<br>6-311+G(2d,p)<br>PCM | B3LYP/<br>6-311+G(2d,p)<br>SMD | HF/<br>6-31G(d)<br>PCM | HF/<br>6-31G(d)<br>SMD |                       |
| C14-H15 | 4.2622                         | 4.3907                         | 3.7744                 | 3.9407                 | 4.14-4.07             |
| O16-H17 | 2.8675                         | 2.6198                         | 2.7487                 | 2.5141                 | 6.03-5.78             |
| C18-H19 | 2.5742                         | 2.6946                         | 2.4646                 | 2.5973                 | 3.11                  |
| C18-H20 | 2.1594                         | 2.0966                         | 2.1491                 | 2.1063                 | 2.96                  |
| N21-H22 | 8.4668                         | 8.3406                         | 7.9858                 | 7.8898                 | 6.78                  |
| N21-H23 | 5.1097                         | 5.2309                         | 4.6628                 | 4.8415                 | 6.78                  |
| C24-H25 | 1.4332                         | 1.4637                         | 1.2151                 | 1.2278                 | 3.27                  |

\*The chemical shifts are referenced to TMS calculated at the same level of theory

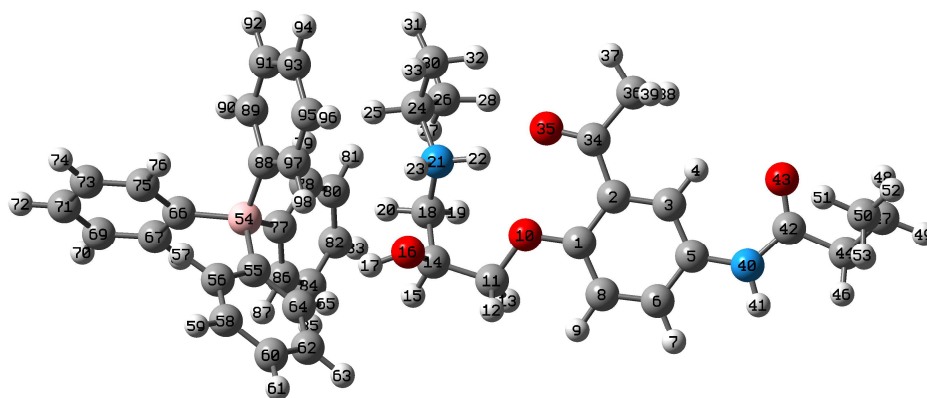

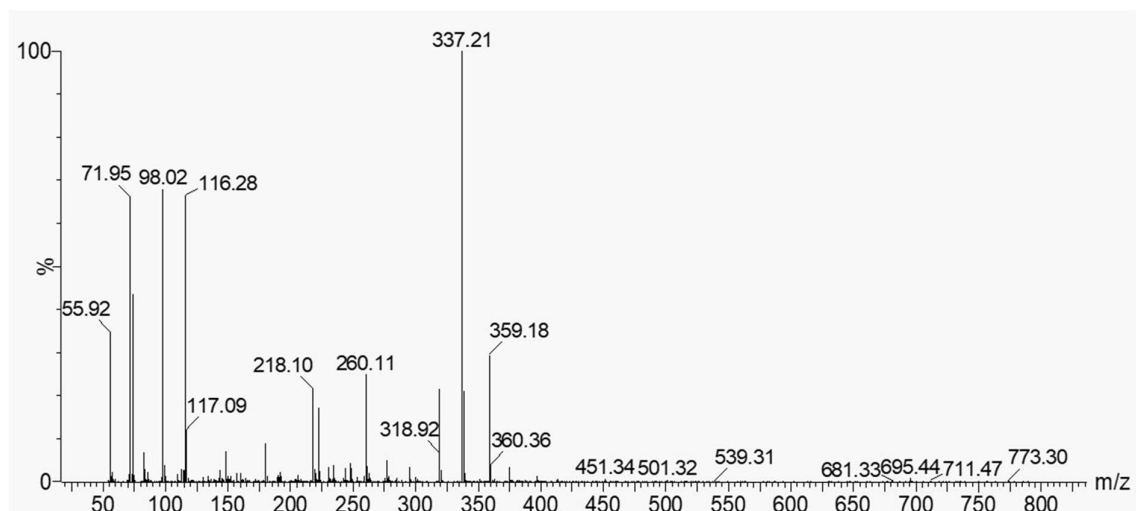

(a)

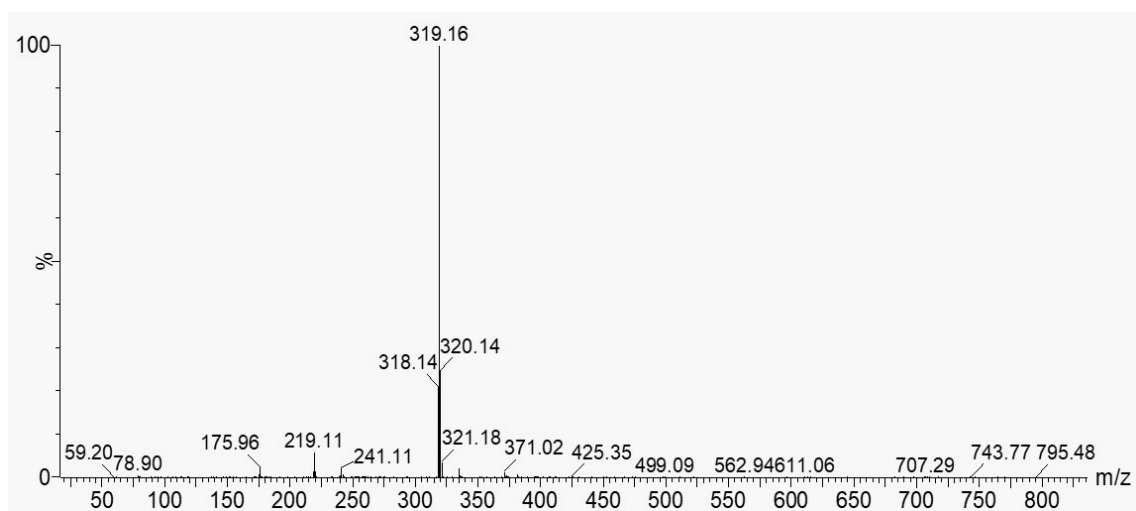

(b)

**Fig. S9** ESI MS spectra of Acebutolol-tetraphenyl borate ion-pair complex.
